# Supplementary material for: The electronic structure of a strongly bound sandwich MoS2–WS2heterobilayer
Source: Royal Society of Chemistry journal article supplement (doi:10.1039/d3cp02212a), 2023-01-01
Supplement: d3cp02212a1.pdf [file d3cp02212a1.pdf]

## Supplementary Information

# Electronic Structure of Strongly Bound Sandwich MoS<sub>2</sub>–WS<sub>2</sub> Heterobilayer

Getasew Mulualet Zewdie,<sup>†</sup> Mourad Boujnah,<sup>†</sup> Ju Yeon Kim<sup>#</sup>, Hong Seok Kang<sup>\*,§</sup>

<sup>†</sup> Institute for Application of Advanced Materials, Jeonju University, Chonbuk 55069, Republic of Korea

<sup>#</sup> Department of Micro-device engineering, Korea University, Seongbuk-gu, Seoul 02841, Republic of Korea

<sup>§</sup> Department of Nano and Advanced Materials, Jeonju University, Chonju, Chonbuk 55069, Republic of Korea

*\* Address correspondence to E-mail: [hsk@jj.ac.kr](mailto:hsk@jj.ac.kr)*

### Carrier Mobility:

The carrier mobility of 2D materials ( $\mu_{2D}$ ) is usually estimated from the deformation-potential theory, which can be expressed according to Equation (S1):

$$\mu_{2D} = \frac{e\hbar^3 C_{2D}}{k_B T m^* m_d (E_1^i)^2} \quad (S1)$$

Where  $e$  is the electron charge,  $\hbar$  is the reduced Planck constant,  $C_{2D}$  is the in-plane elastic modulus in the transport direction,  $k_B$  is Boltzmann constant,  $T$  is the temperature at 300 K,  $m^*$  is

the effective mass of the carrier in the same direction,  $m_d$  is the average effective mass in the two directions as given by  $m_d = \sqrt{m_a^* + m_b^*}$ , and  $E_1^i$  is the deformation potential constant for both electrons and holes along the  $a$ - and  $b$ -directions.  $E_1^i$  is obtained by linearly fitting the VBM and CBM as functions of the applied strain. The  $m^*$  of electrons and holes are calculated according to Equation (S2):

$$m^* = \frac{\hbar^2}{\partial^2 E / \partial K^2} \quad (S2)$$

Here,  $K$  is the wave vector and  $E$  is the energy corresponding to the wave vector.

### **Absorption Coefficients:**

The optical absorption coefficient ( $\alpha(\omega)$ ) can be obtained from the frequency-dependent complex dielectric function ( $\epsilon(\omega)$ ) according to Equation S3:

$$\alpha(\omega) = \sqrt{2} \frac{\omega}{c} \left( \sqrt{\epsilon_1^2(\omega) + \epsilon_2^2(\omega)} - \epsilon_1(\omega) \right)^{1/2} \quad (S3)$$

In this equation,  $\epsilon_1(\omega)$  and  $\epsilon_2(\omega)$  represent the real and imaginary parts of the dielectric function, respectively. While,  $\omega$  is the photon frequency.

**Table S1:** The difference in the energy eigenvalues (in eV) of the valence band (VB) and VB-1 ( $E_{\text{VB}}-E_{\text{VB-1}}$ ), and that of the conduction band (CB) and CB+1 ( $E_{\text{CB+1}}-E_{\text{CB}}$ ) at the K and  $\Gamma$  points of the sandwich homobilayer (HoBL) under external E-field. Under zero E-field, numbers inside parentheses correspond to those of the pristine MoS<sub>2</sub> HoBL. The PBE exchange-correlation functional is employed.

| Sandwich HoBL    |                                 |                   |                                 |                   |
|------------------|---------------------------------|-------------------|---------------------------------|-------------------|
| E-field<br>(V/Å) | $E_{\text{VB}}-E_{\text{VB-1}}$ |                   | $E_{\text{CB+1}}-E_{\text{CB}}$ |                   |
|                  | at K point                      | at $\Gamma$ point | at K point                      | at $\Gamma$ point |
| -0.50            | 0.59                            | 0.72              | 0.08                            | 0.20              |
| -0.25            | 0.34                            | 0.44              | 0.07                            | 0.19              |
| 0.00             | 0.04 (0.09)                     | 0.28 (0.67)       | 0.01 (0.00)                     | 0.05 (0.00)       |
| +0.25            | 0.34                            | 0.44              | 0.07                            | 0.19              |
| +0.50            | 0.59                            | 0.72              | 0.08                            | 0.20              |

**Table S2.** The difference in the energy eigenvalues (in eV) of the valence band (VB) and VB-1 ( $E_{\text{VB}}-E_{\text{VB-1}}$ ), and that of the conduction band (CB) and CB+1 ( $E_{\text{CB+1}}-E_{\text{CB}}$ ) at the K and  $\Gamma$  points of the sandwich heterobilayer (HtBL) under external E-field. Under zero E-field, numbers inside parentheses correspond to those of the pristine WS<sub>2</sub>–MoS<sub>2</sub> HtBL. The PBE exchange-correlation functional is employed.

| Sandwich HtBL    |                                 |                   |                                 |                   |
|------------------|---------------------------------|-------------------|---------------------------------|-------------------|
| E-field<br>(V/Å) | $E_{\text{VB}}-E_{\text{VB-1}}$ |                   | $E_{\text{CB+1}}-E_{\text{CB}}$ |                   |
|                  | at K point                      | at $\Gamma$ point | at K point                      | at $\Gamma$ point |
| -0.50            | 0.67                            | 0.85              | 0.13                            | 0.20              |
| -0.25            | 0.59                            | 0.60              | 0.11                            | 0.18              |
| 0.00             | 0.26 (0.23)                     | 0.34 (0.70)       | 0.09 (0.11)                     | 0.09 (0.00)       |
| +0.25            | 0.08                            | 0.33              | 0.02                            | 0.10              |
| +0.50            | 0.40                            | 0.57              | 0.09                            | 0.10              |

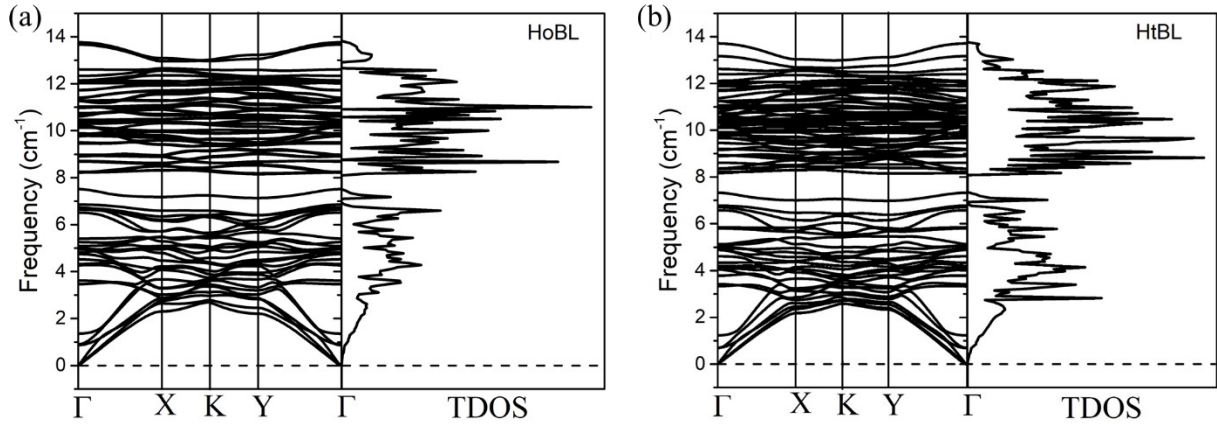

**Fig. S1** (a)-(b) Phonon dispersion spectra and phonon density of states of the sandwich homobilayer (HoBL) and heterobilayer (HtBL).

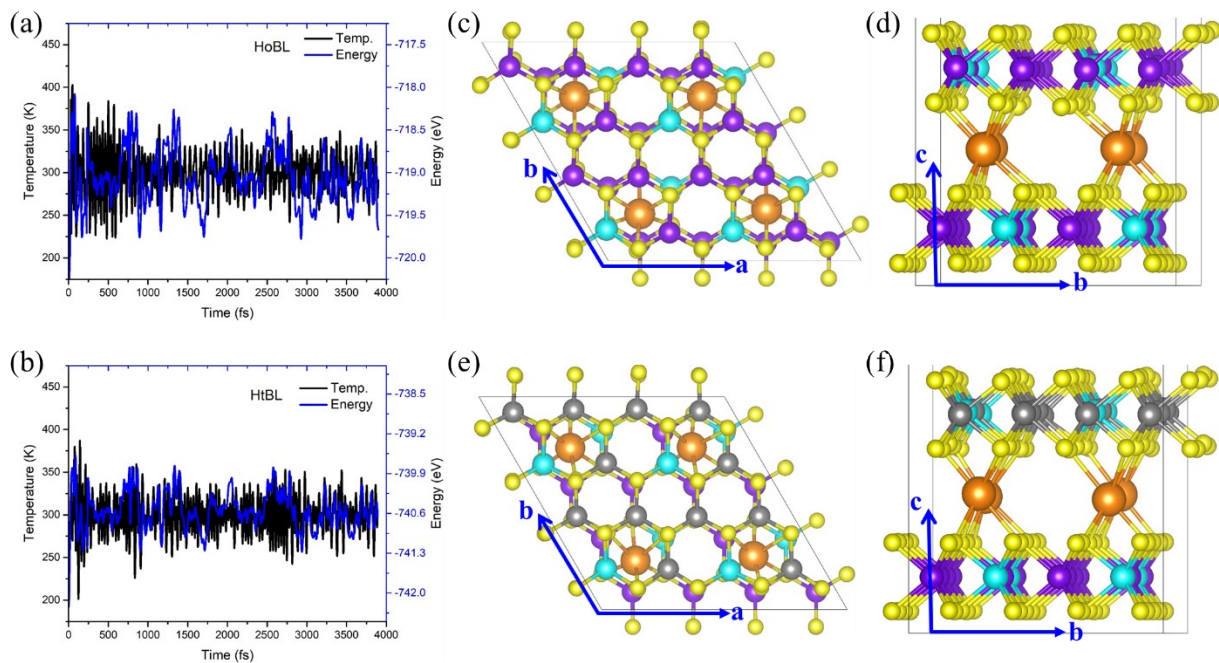

**Fig. S2** (a)-(b) The time evolutions of temperature (K) and corresponding total energy (eV) in the sandwich homobilayer (HoBL) and heterobilayer (HtBL) during the AIMD simulation at 300 K. (c)-(d) Top and side views of the chemical structure of the sandwich HoBL at the end of the AIMD simulation. (e)-(f) Top and side views of the chemical structure of the sandwich HtBL at the end of the AIMD simulation. Orange, cyan, purple, grey, and yellow colors represent Ca, Nb, Mo, W, and S atoms, respectively.

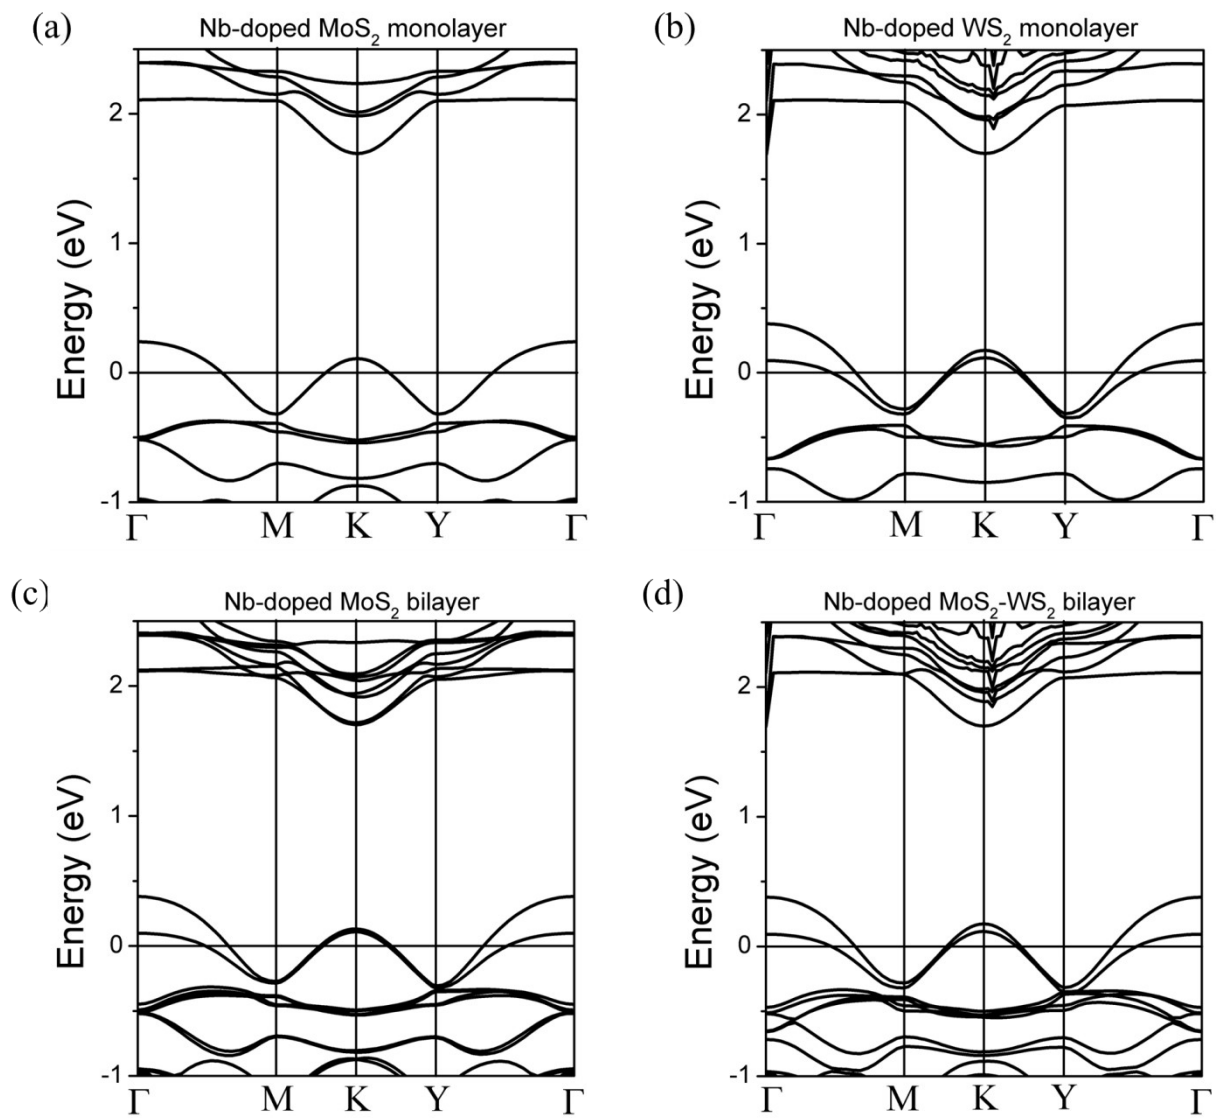

**Fig. S3** (a)-(d) The electronic band structures of the Nb-doped  $\text{MoS}_2$  monolayer, Nb-doped  $\text{WS}_2$  monolayer, Nb-doped  $\text{MoS}_2$  homobilayer, and Nb-doped  $\text{WS}_2$ - $\text{MoS}_2$  heterobilayer using the PBE method.

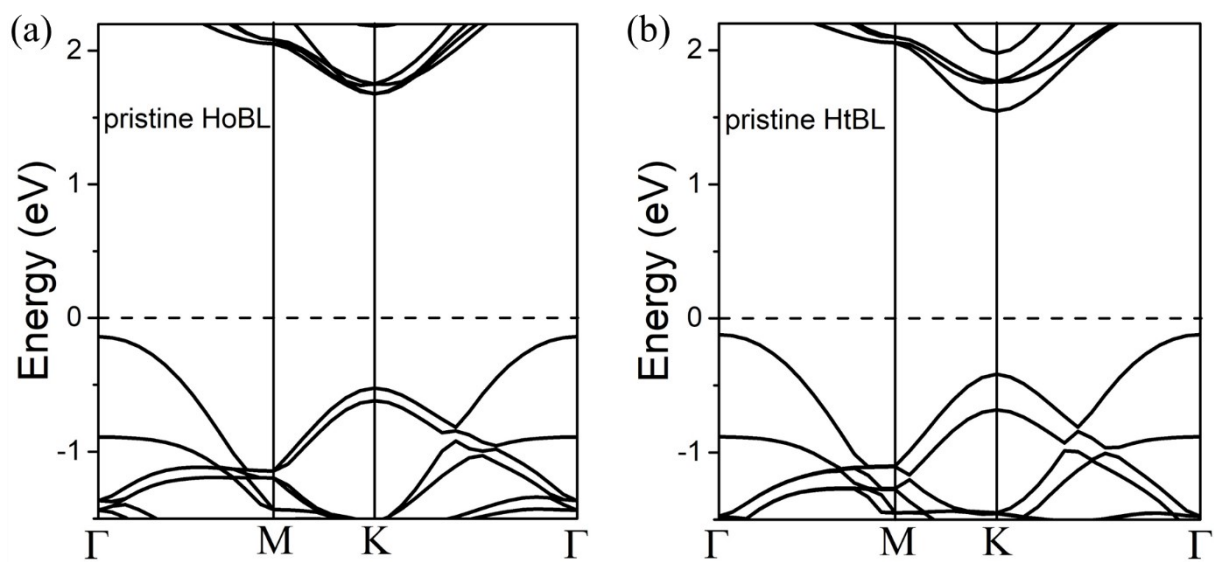

**Fig. S4** (a)-(b) The electronic band structures of the pristine MoS<sub>2</sub> homobilayer (HoBL) and WS<sub>2</sub>-MoS<sub>2</sub> heterobilayer (HtBL), using the HSE06 method.

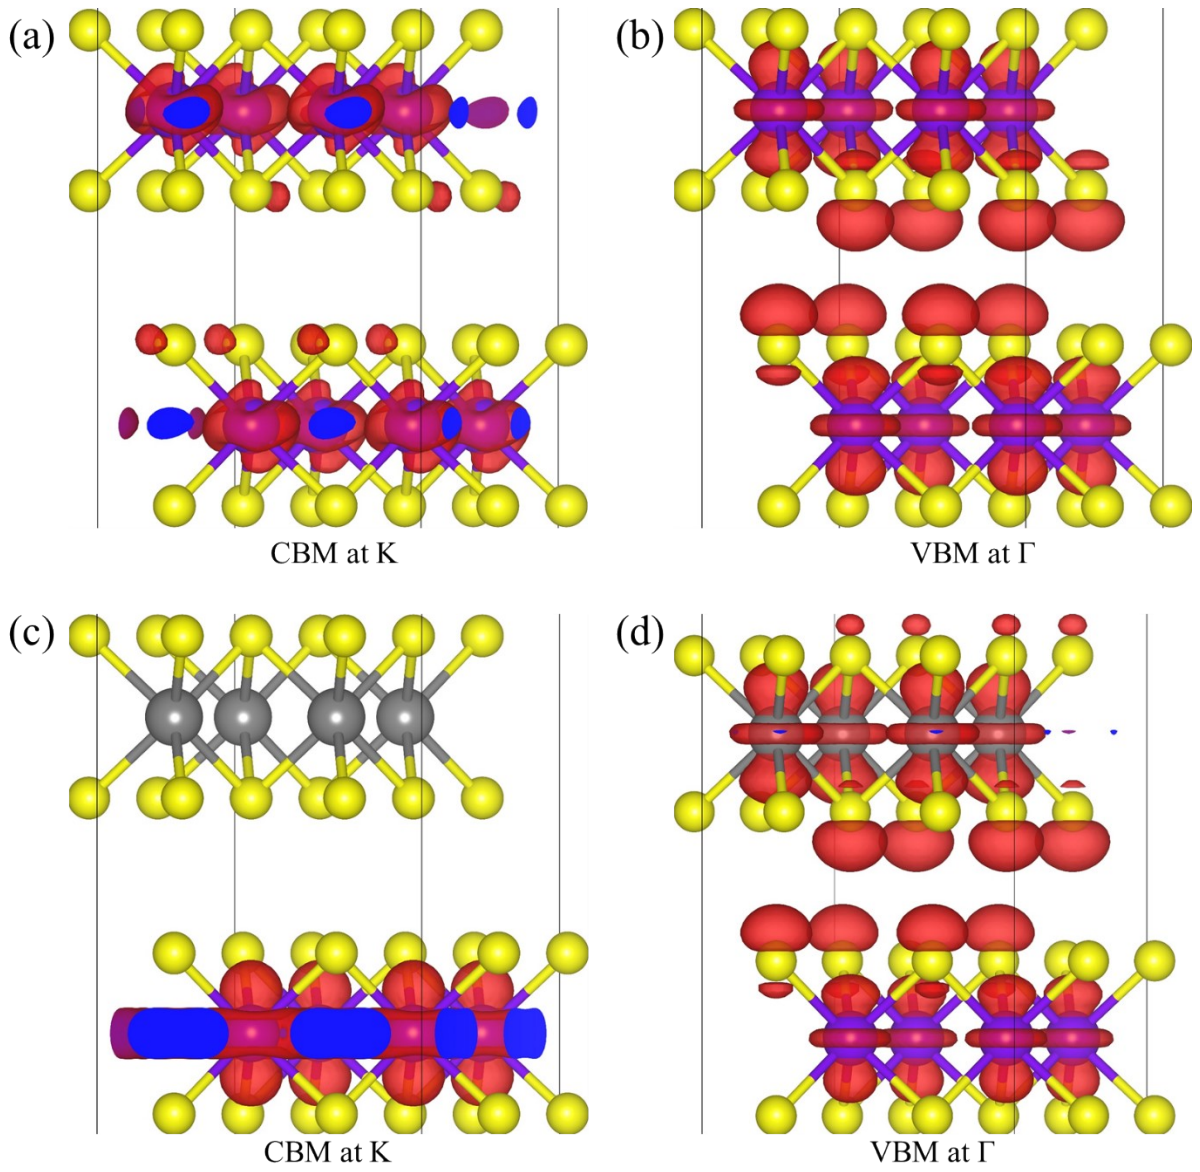

**Fig. S5** The decomposed charge densities of the pristine (a)-(b) MoS<sub>2</sub> homobilayer (HoBL) and (c)-(d) WS<sub>2</sub>-MoS<sub>2</sub> heterobilayer (HtBL). at the CBM(K) and VBM( $\Gamma$ ). The isosurface value is set to  $1.8 \times 10^{-3} e\text{\AA}^3$ . Purple, grey, and yellow colors represent Mo, W, and S atoms, respectively.

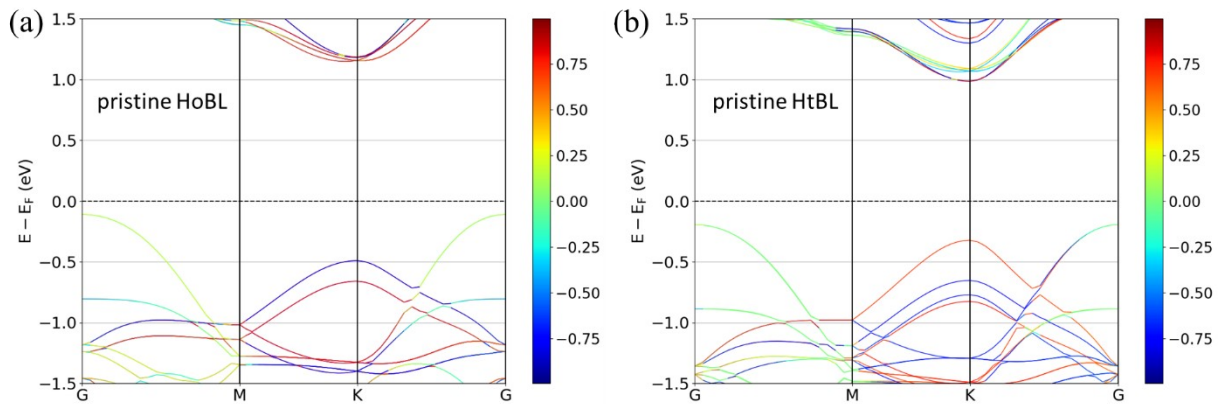

**Fig. S6** (a)-(b) The electronic band structures of the pristine MoS<sub>2</sub> homobilayer (HoBL) and WS<sub>2</sub>-MoS<sub>2</sub> heterobilayer (HtBL) with Spin-Orbit Coupling (SOC) using the PBE method, respectively.

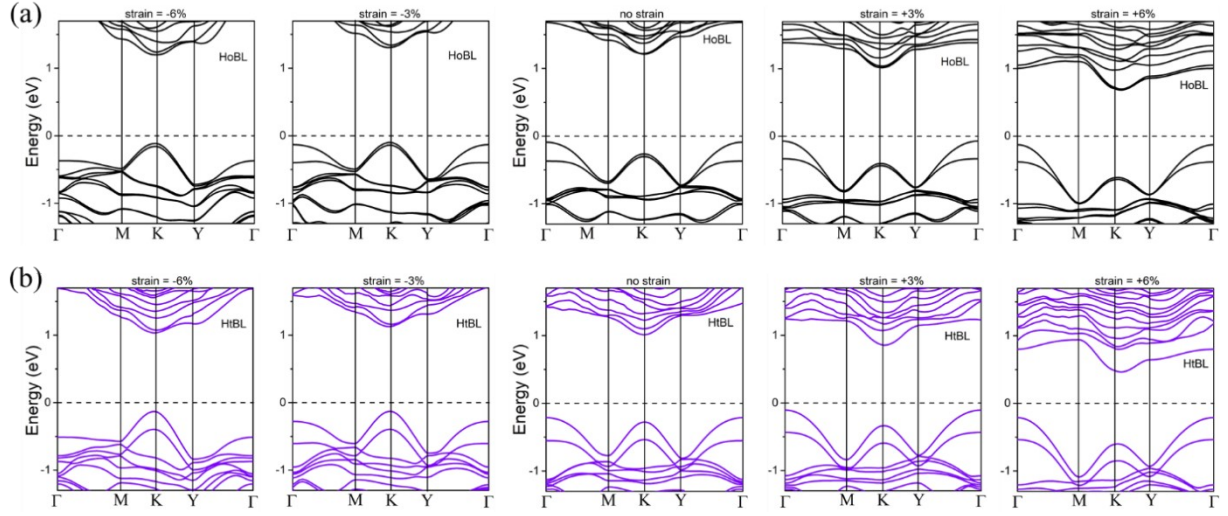

**Fig. S7** (a)-(b) The electronic band structures of the sandwich homobilayer (HoBL) and heterobilayer (HtBL) under strain along the  $a$  direction from -6% to 6% using the PBE method.

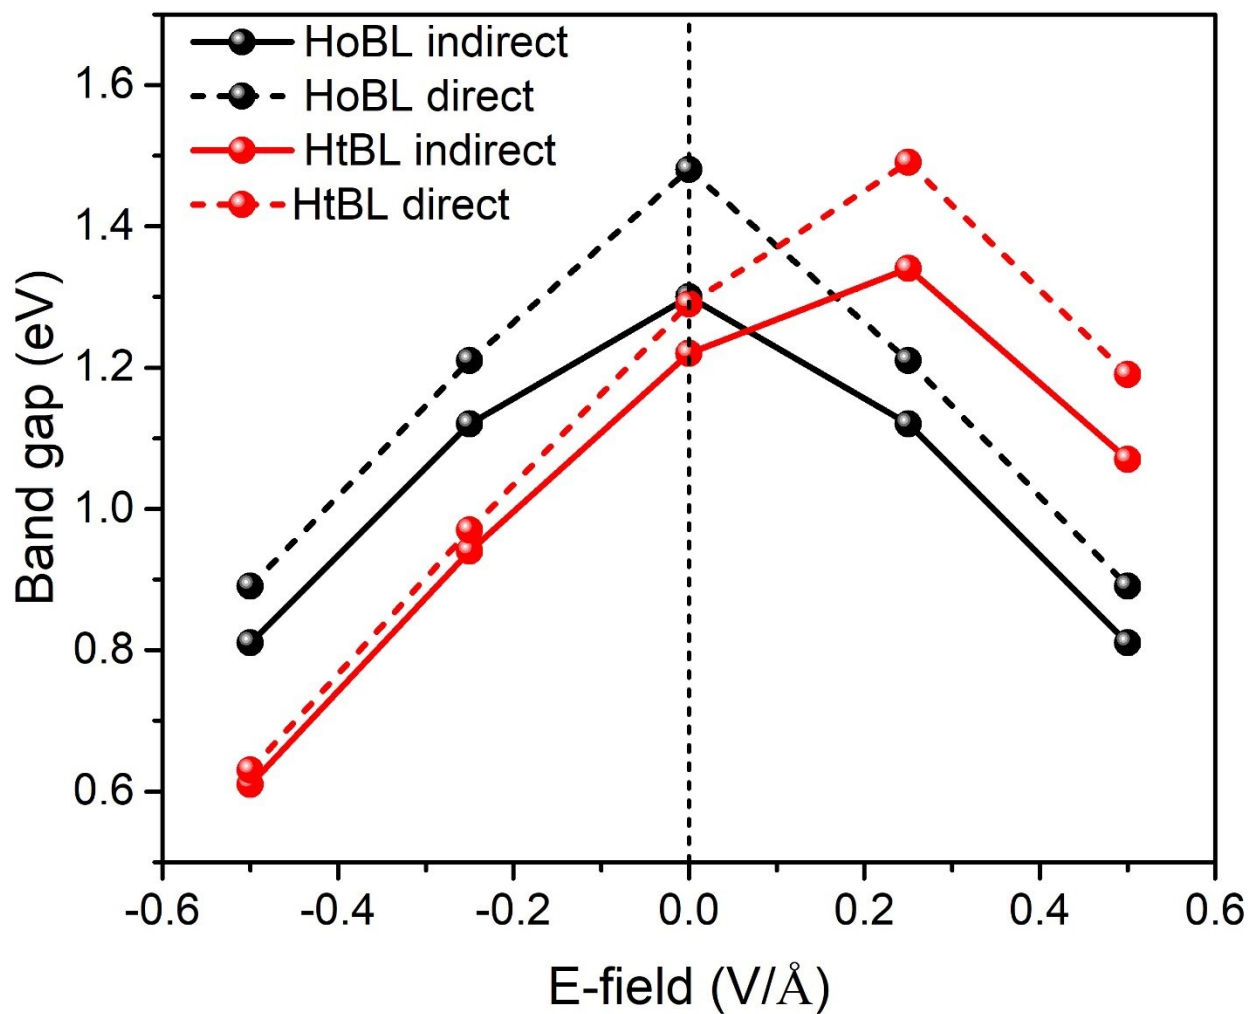

**Fig. S8** The band gap of the sandwich homobilayer (HoBL) and heterobilayer (HtBL) as a function of external E-field along the vertical directions using the PBE method. Solid and dashed lines represent the *indirect* and *direct* band gaps, respectively.

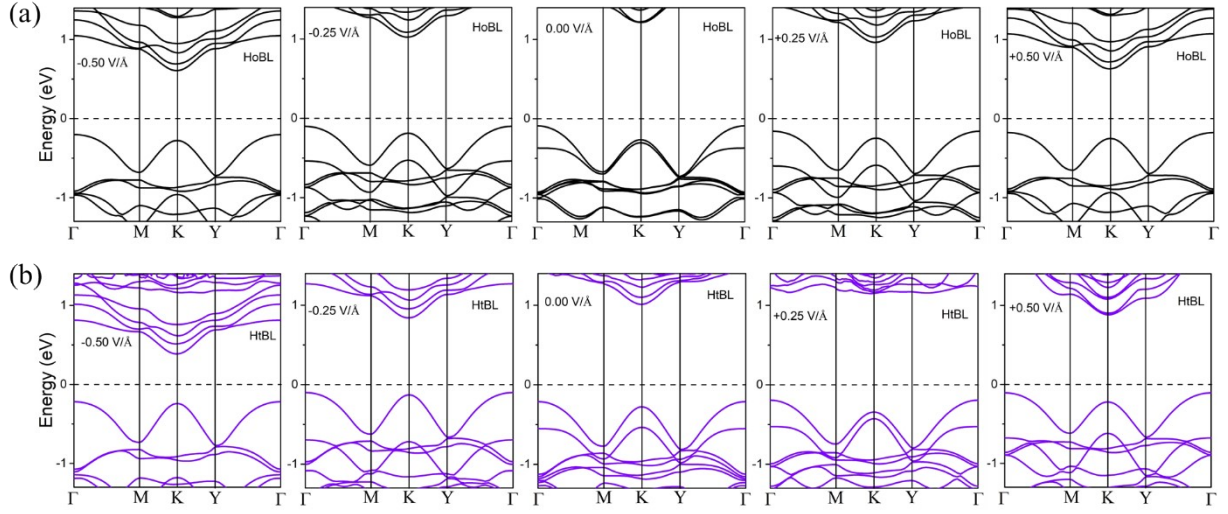

**Fig. S9** (a)-(b) The electronic band structures of the sandwich homobilayer (HoBL) and heterobilayer (HtBL) under external E-field from  $-0.5 \text{ V/\AA}$  to  $0.5 \text{ V/\AA}$  using the PBE method.

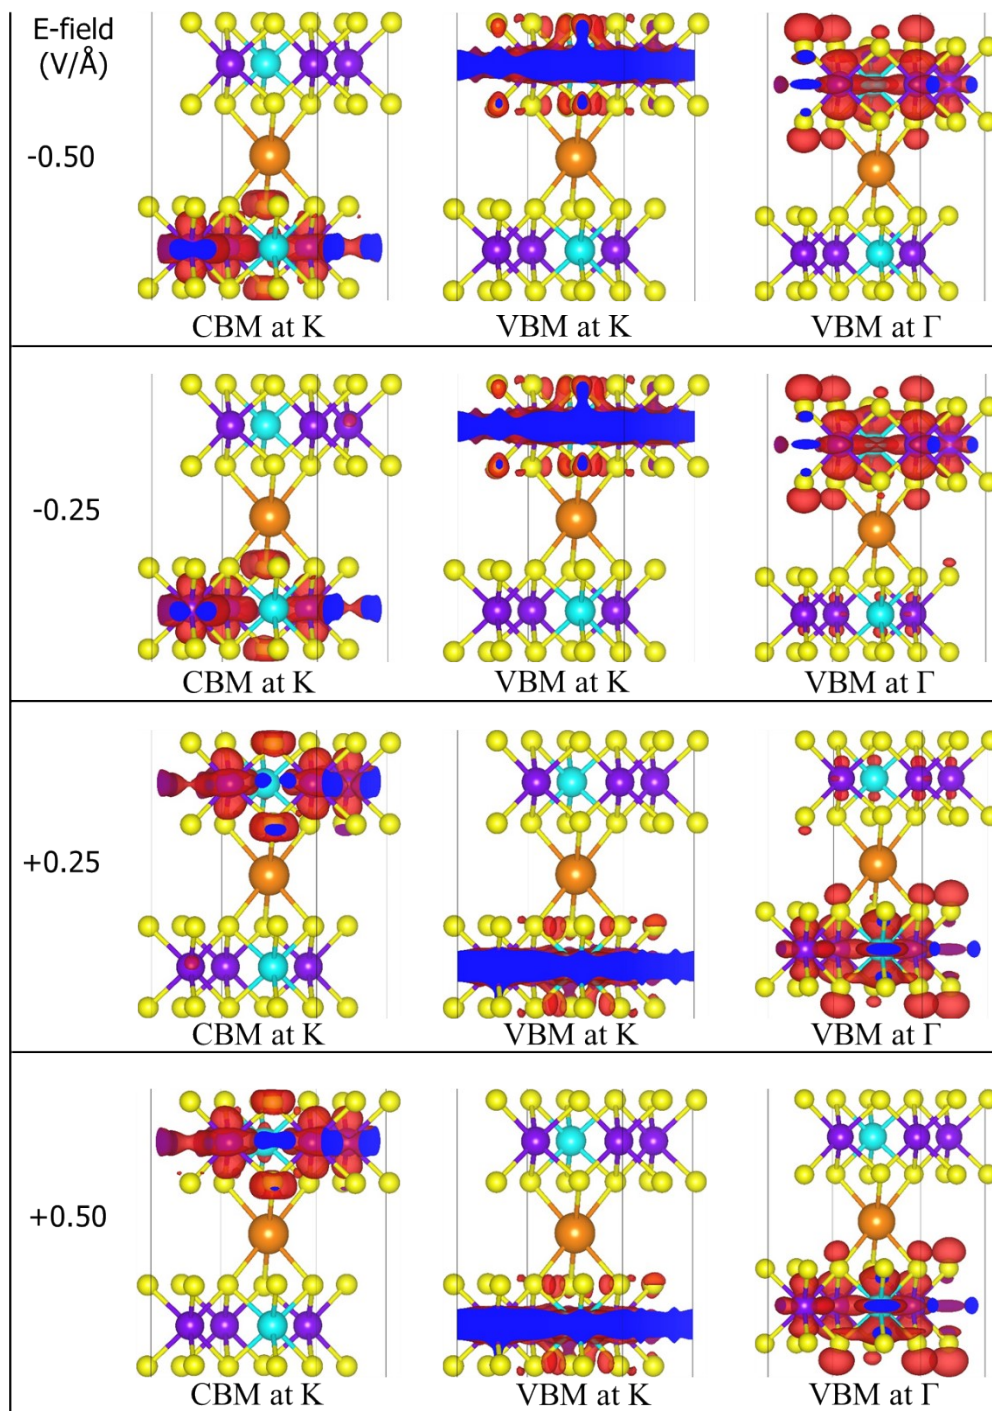

**Fig. S10** The decomposed charge densities of the sandwich homobilayer (HoBL) under external E-field at the CBM(K), VBM(K), and VBM( $\Gamma$ ). The isosurface value is set to  $2.3 \times 10^{-3} e\text{\AA}^3$ . Orange, cyan, purple, and yellow colors represent Ca, Nb, Mo, and S atoms, respectively.

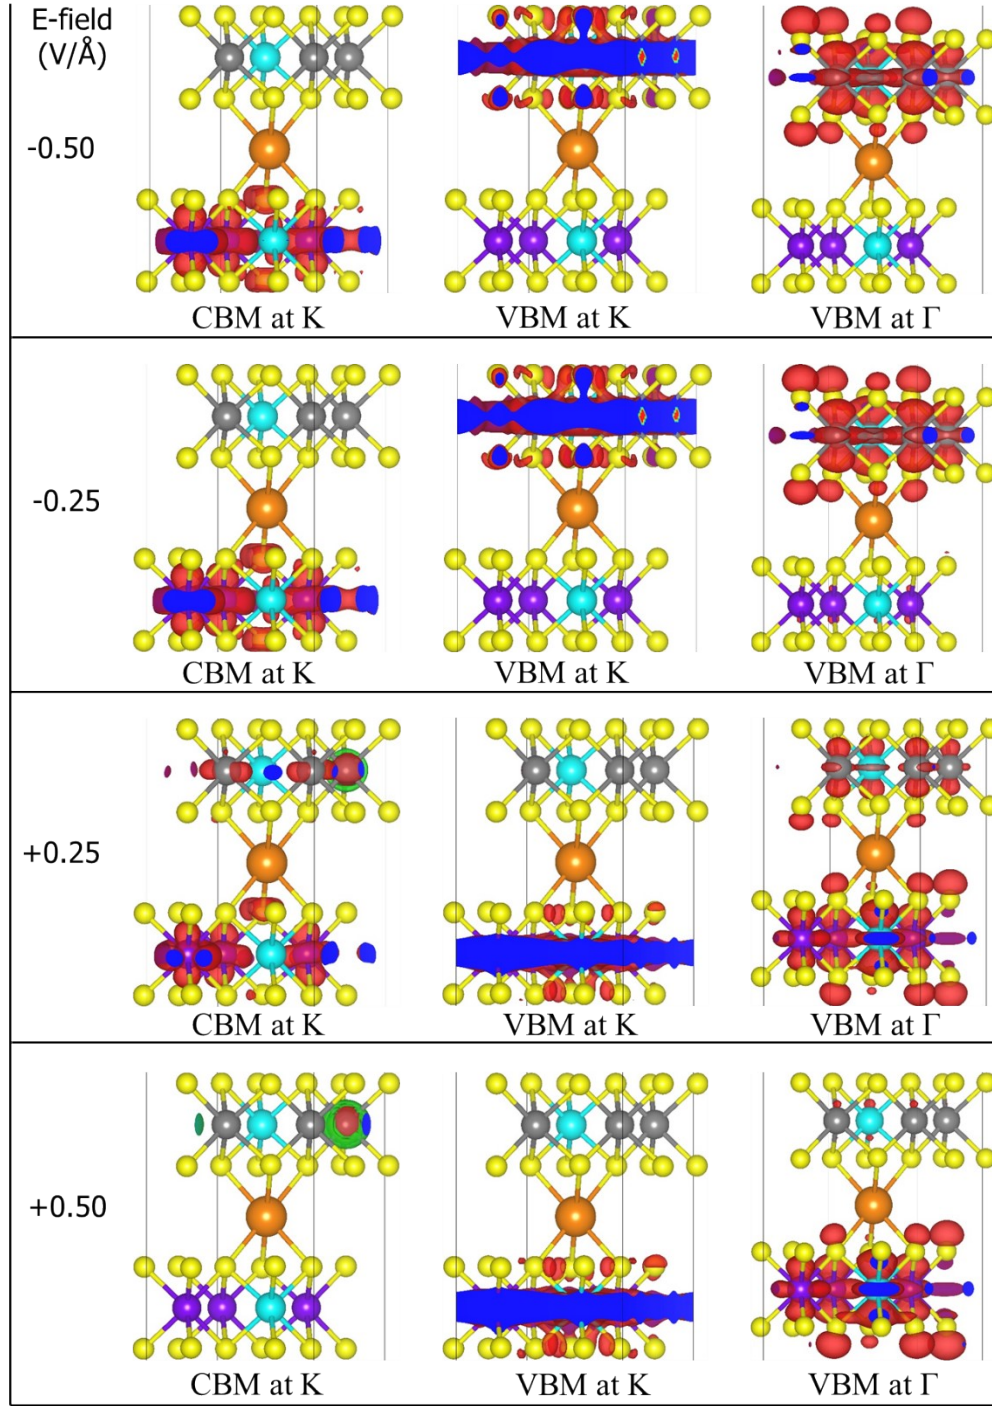

**Fig. S11** The decomposed charge densities of the sandwich heterobilayer (HtBL) under external E-field at the CBM(K), VBM(K), and VBM( $\Gamma$ ). The isosurface value is set to  $2.3 \times 10^{-3} e\text{\AA}^3$ . Orange, cyan, purple, grey, and yellow colors represent Ca, Nb, Mo, W, and S atoms, respectively.

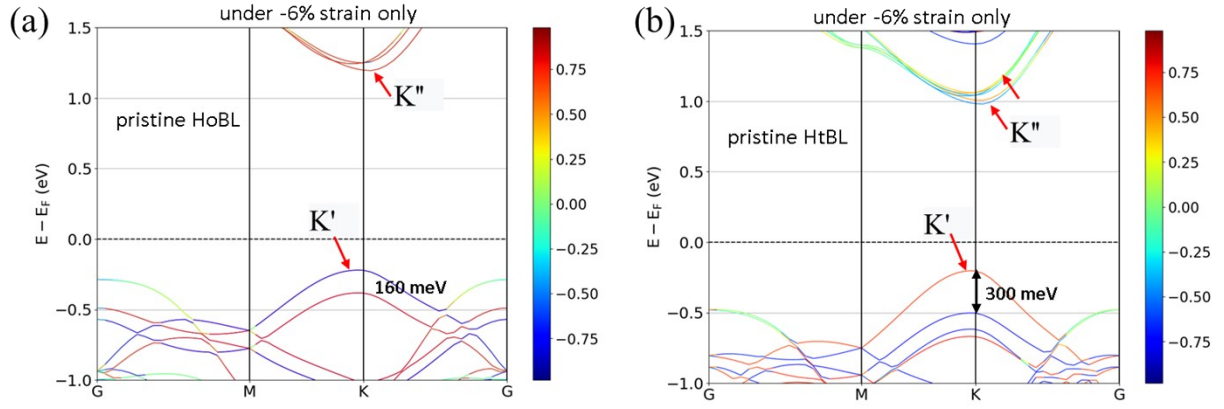

**Fig. S12** The electronic band structures of the pristine MoS<sub>2</sub> homobilayer (HoBL) and WS<sub>2</sub>-MoS<sub>2</sub> heterobilayer (HtBL) with Spin-Orbit Coupling (SOC) using the PBE method at 6% compressive strain. Arrows indicate band edge positions.

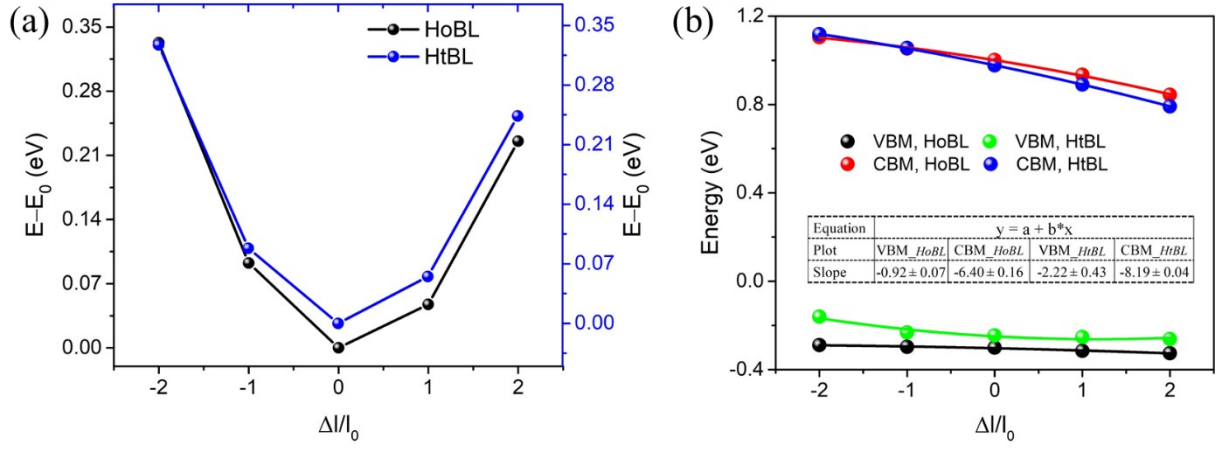

**Fig. S13** (a) The total energy vs. strain in the sandwich homobilayer (HoBL) and heterobilayer (HtBL). (b) The energy shifts of the valence band maximum (VBM) and conduction band minimum (CBM) vs. strain.

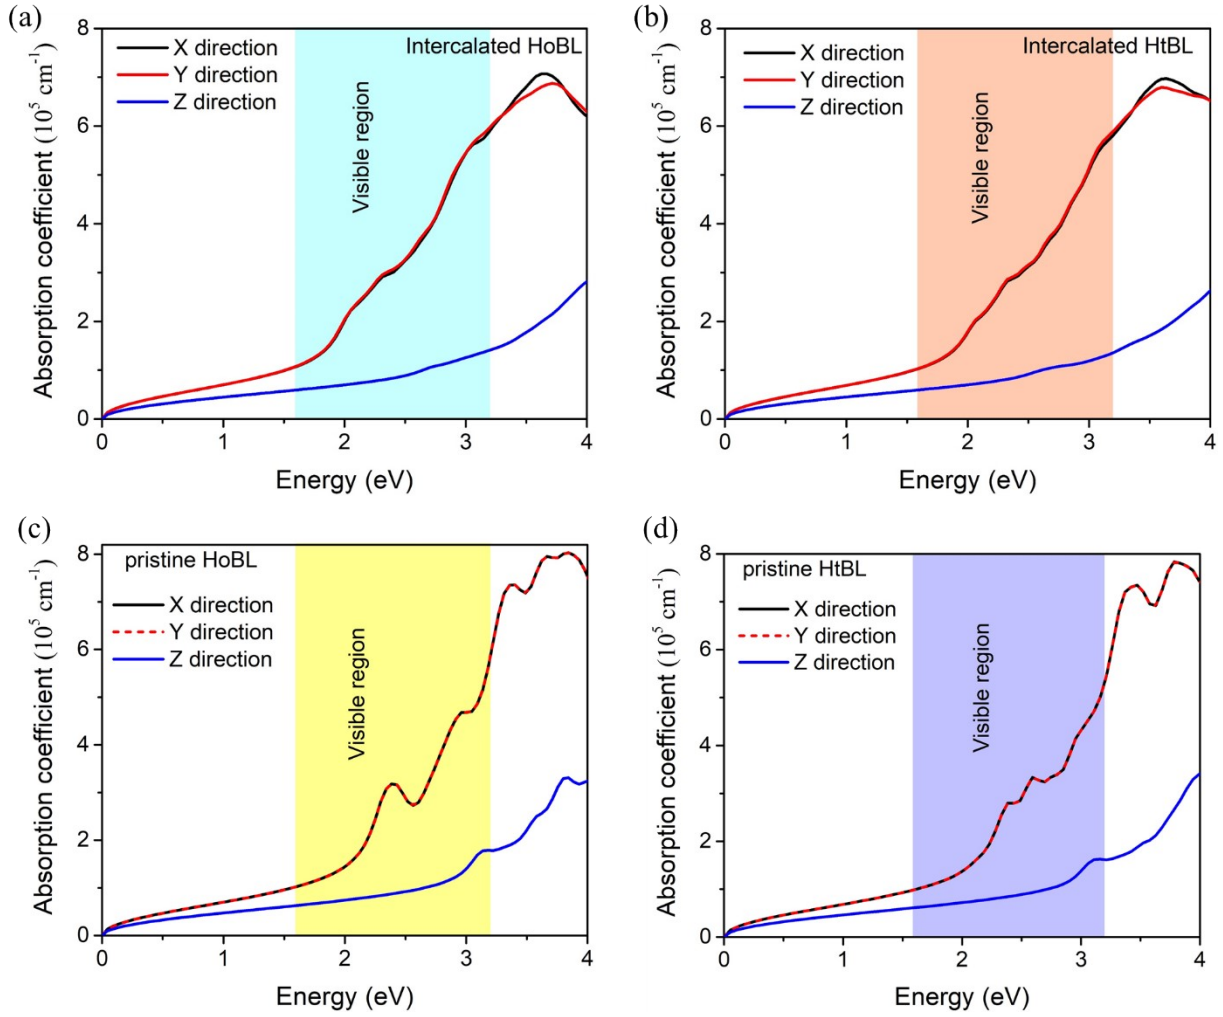

**Fig. S14** Calculated absorption coefficients of the (a) sandwich homobilayer (HoBL) and (b) sandwich heterobilayer (HtBL), (c) pristine MoS<sub>2</sub> HoBL, and (d) pristine WS<sub>2</sub>–MoS<sub>2</sub> HtBL for incident light polarized along the X, Y, and Z directions using the HSE06 method. The highlighted part represents the visible light region.
